# Supplementary material for: β-Dispersion of blood during sedimentation
Source: PubMed Central journal article supplement (PMC7846779; doi:10.1038/s41598-021-82171-x), 2021-01-29
Supplement: 41598_2021_82171_MOESM1_ESM.pdf [file 41598_2021_82171_MOESM1_ESM.pdf]

# $\beta$ -Dispersion of Blood during Sedimentation

Ahmet C. Sabuncu<sup>1,\*</sup>, Sinan Muldur<sup>2</sup>, Barbaros Cetin<sup>3</sup>, O. Berk Usta<sup>2</sup>, Nadine Aubry<sup>4</sup>

## Supplementary Information

**Figure S1.** Capacitance of different amounts of phosphate buffered saline was measured to determine the optimum amount of liquid in the chamber.

**Figure S2.** Measured (markers) and modelled (continuous line) dielectric spectra from a representative measurement (HCT=47% and sample 1, time point 2).

**Figure S3.** Square root of sum of residuals squared (L2 norm error) from a representative experiment with HCT = 47%.

**Figure S4.** Low frequency permittivity ( $\epsilon_l$ ) of the blood samples. Different color lines correspond to different samples

**Figure S5.** Time response of low frequency permittivity ( $\epsilon_l$ ) from a representative experiment with HCT = 45% and with conditions for sample 1 in Table 1.

**Figure S6.** The derivative of the difference between samples' low frequency permittivity (A) and dielectric relaxation time constant (B).

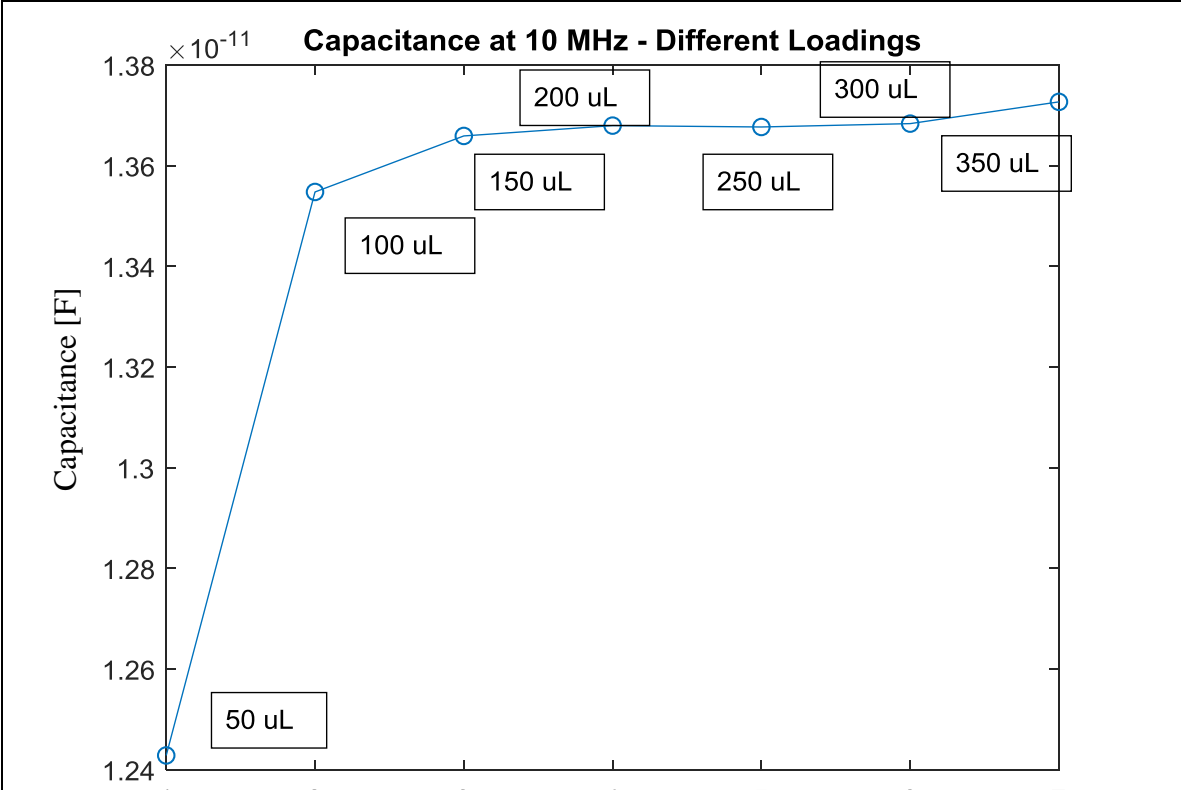

**Figure S1. Capacitance of different amounts of phosphate buffered saline was measured to determine the optimum amount of liquid in the chamber.**

28

29

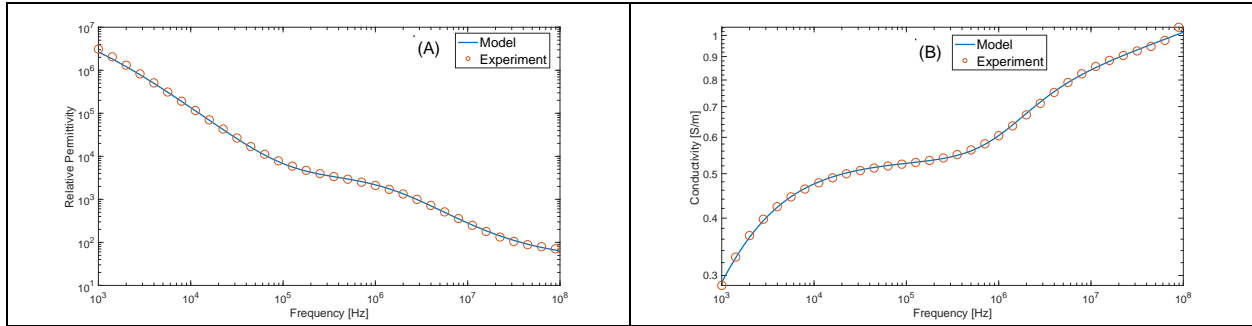

**Figure S2. Measured (markers) and modelled (continuous line) dielectric spectra from a representative measurement (HCT=47% and sample 1, time point 2).** Experimental data is plotted at every three frequency point for clarity. In figures (A) and (B) the relative permittivity and the conductivity spectra are shown, respectively.

33

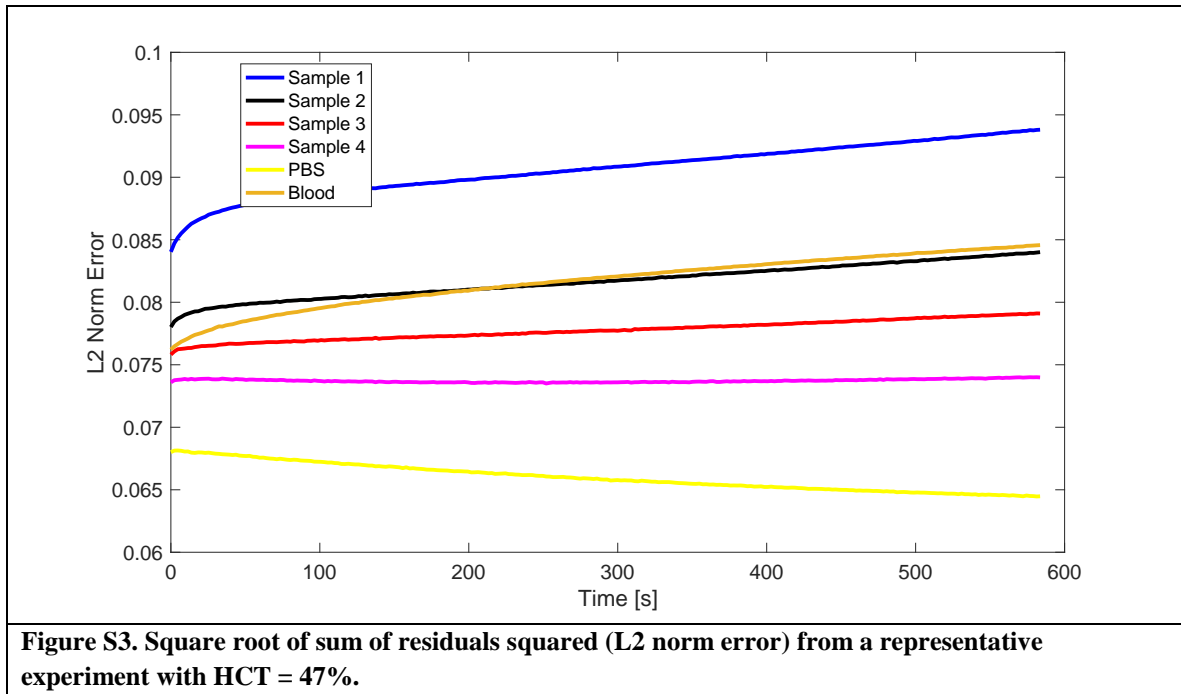

34

35

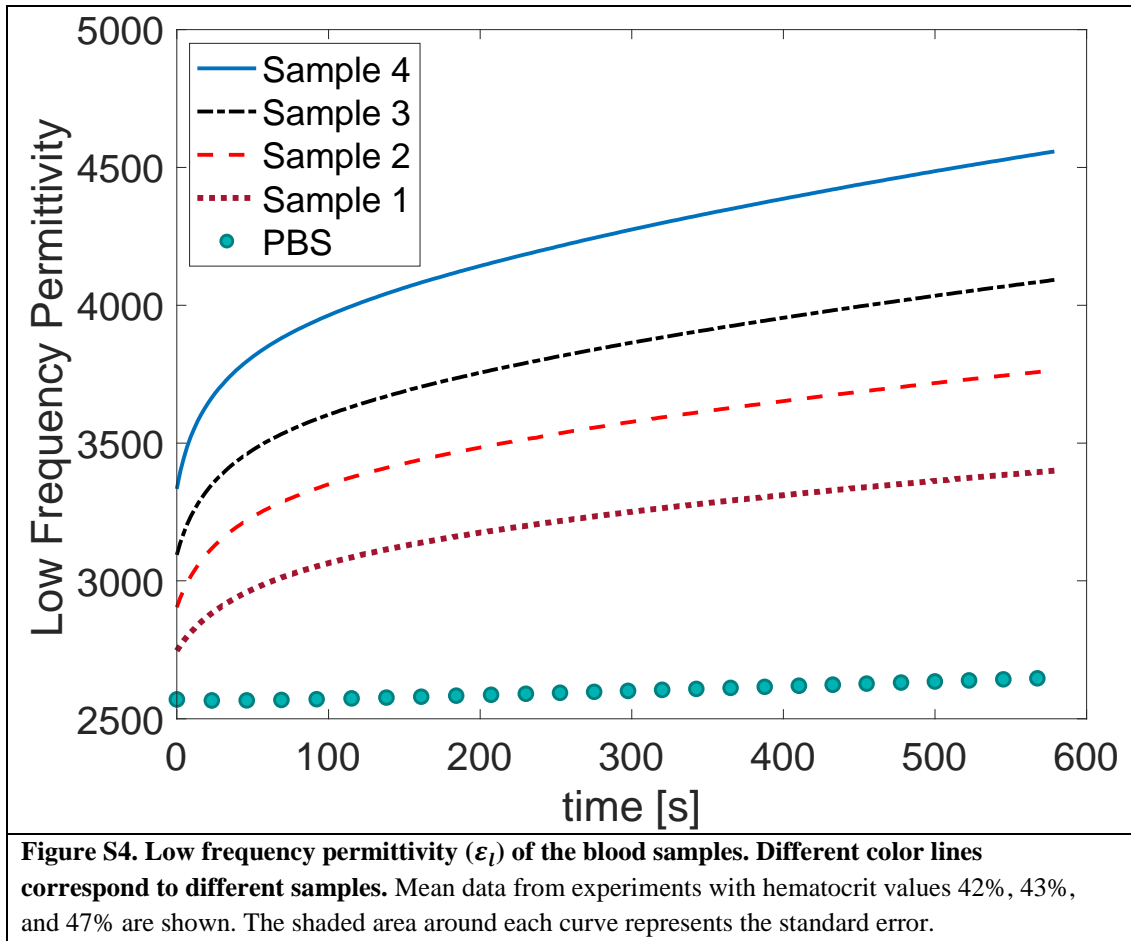

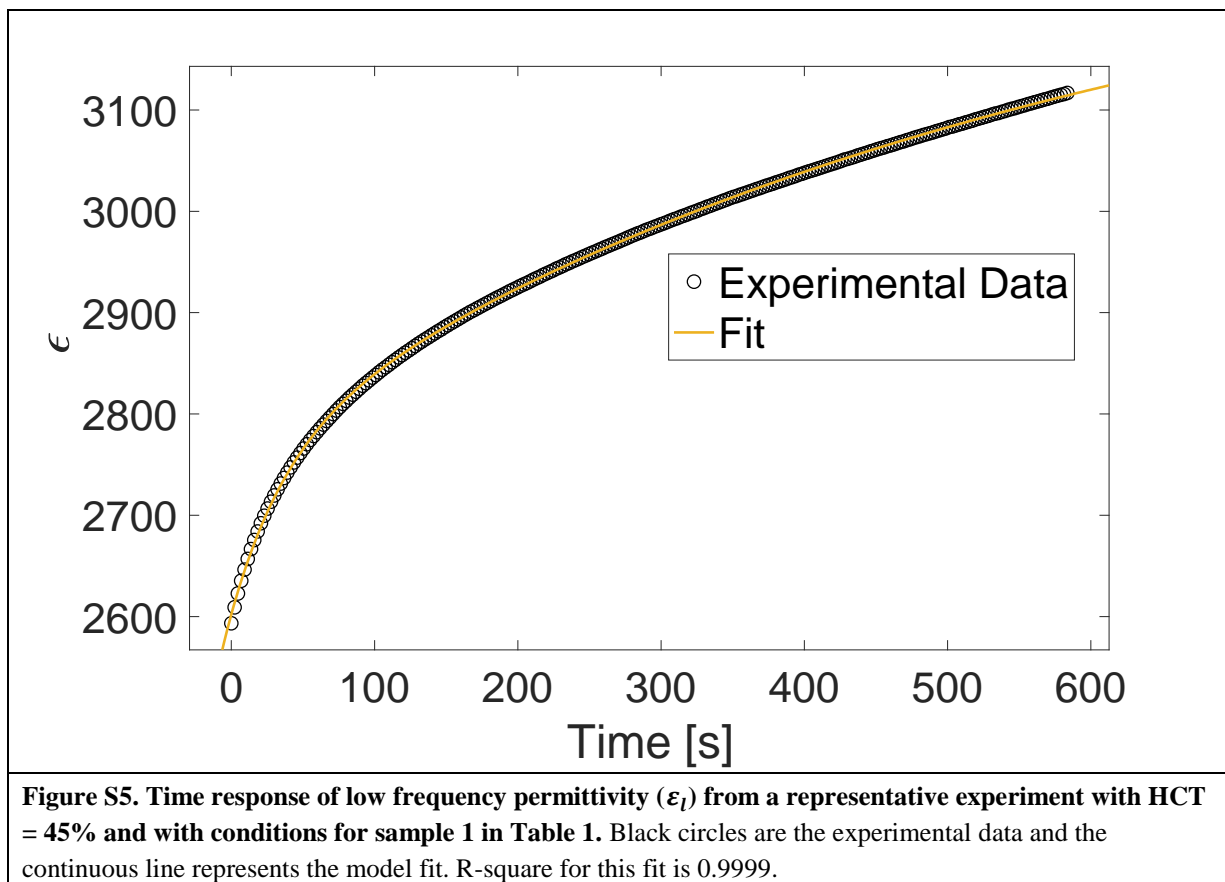

40

41

42

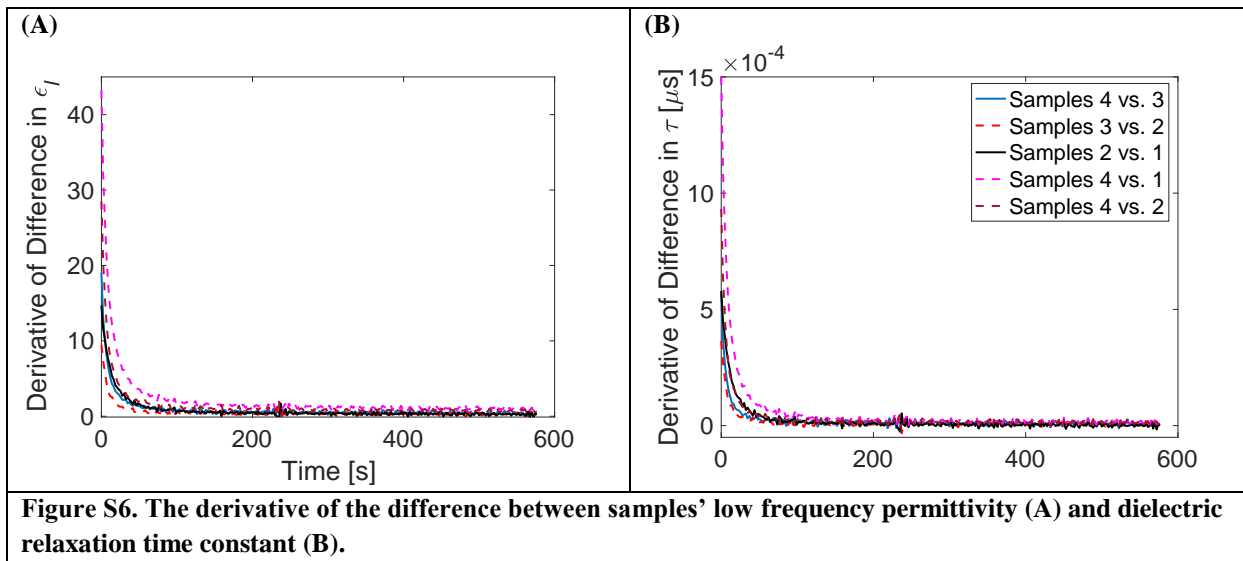

43  
44  
45
